# Supplementary material for: Microwave spectroscopy of the Ne–OH(2Πi) complex and three-dimensional intermolecular potentials
Source: Royal Society of Chemistry journal article supplement (doi:10.1039/c002193h), 2010-01-01
Supplement: c002193h.pdf [file c002193h.pdf]

## Supplementary tables for the article (C002193H)

Yoshihiro Sumiyoshi, Ippei Funahara, Kazuya Sato,

Yasuhiro Ohshima, and Yasuki Endo

*Department of Basic Science, Graduate School of Arts and Sciences,*

*The University of Tokyo, Komaba, Meguro-ku, Tokyo 153-8902, Japan*

The results of Ar-OH in Tables S1 – S6 are given for comparison, which have been newly obtained by the reanalysis based on the new *ab initio* potential surface at the UCCSD(T)/aug-cc-pV5Z level of theory. Experimental data utilized in the reanalysis are exactly the same as those in our previous analysis, *Journal of Chemical Physics*, 2006, **125**, 124307.

**Table S1. FTMW data of Ar-OH <sup>a</sup>**

| $\nu'_s$ | $\nu'$ | $J'$ | $F'$ | $P'$ | $\nu''_s$ | $\nu''$ | $J''$ | $F''$ | $P''$ | parity | Obs.      | O – C <sup>b</sup> |
|----------|--------|------|------|------|-----------|---------|-------|-------|-------|--------|-----------|--------------------|
| 0        | 0      | 2.5  | 2.0  | 1.5  | 0         | 0       | 1.5   | 1.0   | 1.5   | –      | 15349.305 | 0.003              |
| 0        | 0      | 2.5  | 3.0  | 1.5  | 0         | 0       | 1.5   | 2.0   | 1.5   | –      | 15336.420 | 0.003              |
| 0        | 0      | 2.5  | 2.0  | 1.5  | 0         | 0       | 1.5   | 2.0   | 1.5   | –      | 15310.581 | 0.005              |
| 0        | 0      | 2.5  | 2.0  | 1.5  | 0         | 0       | 1.5   | 1.0   | 1.5   | +      | 15364.495 | –0.002             |
| 0        | 0      | 2.5  | 3.0  | 1.5  | 0         | 0       | 1.5   | 2.0   | 1.5   | +      | 15351.583 | –0.003             |
| 0        | 0      | 2.5  | 2.0  | 1.5  | 0         | 0       | 1.5   | 2.0   | 1.5   | +      | 15325.777 | –0.012             |
| 0        | 0      | 3.5  | 3.0  | 1.5  | 0         | 0       | 2.5   | 2.0   | 1.5   | –      | 21499.253 | –0.008             |
| 0        | 0      | 3.5  | 4.0  | 1.5  | 0         | 0       | 2.5   | 3.0   | 1.5   | –      | 21493.518 | –0.013             |
| 0        | 0      | 3.5  | 3.0  | 1.5  | 0         | 0       | 2.5   | 2.0   | 1.5   | +      | 21469.644 | –0.003             |
| 0        | 0      | 3.5  | 4.0  | 1.5  | 0         | 0       | 2.5   | 3.0   | 1.5   | +      | 21463.955 | 0.002              |
| 0        | 0      | 4.5  | 4.0  | 1.5  | 0         | 0       | 3.5   | 3.0   | 1.5   | –      | 27585.573 | 0.005              |
| 0        | 0      | 4.5  | 5.0  | 1.5  | 0         | 0       | 3.5   | 4.0   | 1.5   | –      | 27582.483 | 0.005              |
| 0        | 0      | 4.5  | 4.0  | 1.5  | 0         | 0       | 3.5   | 3.0   | 1.5   | +      | 27633.258 | –0.007             |
| 0        | 0      | 4.5  | 5.0  | 1.5  | 0         | 0       | 3.5   | 4.0   | 1.5   | +      | 27630.127 | –0.004             |
| 0        | 0      | 5.5  | 5.0  | 1.5  | 0         | 0       | 4.5   | 4.0   | 1.5   | –      | 33761.596 | 0.001              |
| 0        | 0      | 5.5  | 6.0  | 1.5  | 0         | 0       | 4.5   | 5.0   | 1.5   | –      | 33759.695 | –0.005             |
| 0        | 0      | 5.5  | 5.0  | 1.5  | 0         | 0       | 4.5   | 4.0   | 1.5   | +      | 33693.035 | 0.003              |
| 0        | 0      | 5.5  | 6.0  | 1.5  | 0         | 0       | 4.5   | 5.0   | 1.5   | +      | 33691.184 | –0.003             |
| 0        | 0      | 6.5  | 6.0  | 1.5  | 0         | 0       | 5.5   | 5.0   | 1.5   | –      | 39790.012 | –0.006             |
| 0        | 0      | 6.5  | 7.0  | 1.5  | 0         | 0       | 5.5   | 6.0   | 1.5   | –      | 39788.864 | –0.002             |
| 0        | 0      | 6.5  | 6.0  | 1.5  | 0         | 0       | 5.5   | 5.0   | 1.5   | +      | 39881.260 | 0.020              |
| 0        | 0      | 6.5  | 7.0  | 1.5  | 0         | 0       | 5.5   | 6.0   | 1.5   | +      | 39880.052 | 0.019              |
| 0        | 0      | 7.5  | 7.0  | 1.5  | 0         | 0       | 6.5   | 6.0   | 1.5   | –      | 45989.467 | –0.017             |
| 0        | 0      | 7.5  | 8.0  | 1.5  | 0         | 0       | 6.5   | 7.0   | 1.5   | –      | 45988.700 | 0.003              |
| 0        | 0      | 7.5  | 7.0  | 1.5  | 0         | 0       | 6.5   | 6.0   | 1.5   | +      | 45874.859 | 0.009              |
| 0        | 0      | 7.5  | 8.0  | 1.5  | 0         | 0       | 6.5   | 7.0   | 1.5   | +      | 45874.115 | –0.006             |
| 1        | 0      | 2.5  | 2.0  | 1.5  | 1         | 0       | 1.5   | 1.0   | 1.5   | –      | 15135.140 | 0.000              |
| 1        | 0      | 2.5  | 3.0  | 1.5  | 1         | 0       | 1.5   | 2.0   | 1.5   | –      | 15123.433 | –0.004             |
| 1        | 0      | 2.5  | 2.0  | 1.5  | 1         | 0       | 1.5   | 2.0   | 1.5   | –      | 15100.037 | 0.013              |
| 1        | 0      | 2.5  | 2.0  | 1.5  | 1         | 0       | 1.5   | 1.0   | 1.5   | +      | 15149.777 | –0.008             |
| 1        | 0      | 2.5  | 3.0  | 1.5  | 1         | 0       | 1.5   | 2.0   | 1.5   | +      | 15138.052 | –0.007             |
| 1        | 0      | 2.5  | 2.0  | 1.5  | 1         | 0       | 1.5   | 2.0   | 1.5   | +      | 15114.685 | 0.002              |

**Table S1 Continued <sup>a</sup>**

| $\nu'_s$ | $\nu'$ | $J'$ | $F'$ | $P'$ | $\nu''_s$ | $\nu''$ | $J''$ | $F''$ | $P''$ | parity | Obs.      | O – C <sup>b</sup> |
|----------|--------|------|------|------|-----------|---------|-------|-------|-------|--------|-----------|--------------------|
| 1        | 0      | 3.5  | 3.0  | 1.5  | 1         | 0       | 2.5   | 2.0   | 1.5   | –      | 21199.744 | –0.003             |
| 1        | 0      | 3.5  | 4.0  | 1.5  | 1         | 0       | 2.5   | 3.0   | 1.5   | –      | 21194.533 | –0.003             |
| 1        | 0      | 3.5  | 3.0  | 1.5  | 1         | 0       | 2.5   | 2.0   | 1.5   | +      | 21171.280 | 0.001              |
| 1        | 0      | 3.5  | 4.0  | 1.5  | 1         | 0       | 2.5   | 3.0   | 1.5   | +      | 21166.102 | 0.004              |
| 1        | 0      | 4.5  | 4.0  | 1.5  | 1         | 0       | 3.5   | 3.0   | 1.5   | –      | 27203.229 | 0.010              |
| 1        | 0      | 4.5  | 5.0  | 1.5  | 1         | 0       | 3.5   | 4.0   | 1.5   | –      | 27200.386 | –0.013             |
| 1        | 0      | 4.5  | 4.0  | 1.5  | 1         | 0       | 3.5   | 3.0   | 1.5   | +      | 27248.930 | 0.018              |
| 1        | 0      | 4.5  | 5.0  | 1.5  | 1         | 0       | 3.5   | 4.0   | 1.5   | +      | 27246.044 | –0.012             |
| 2        | 0      | 2.5  | 2.0  | 1.5  | 2         | 0       | 1.5   | 1.0   | 1.5   | –      | 14897.631 | 0.010              |
| 2        | 0      | 2.5  | 3.0  | 1.5  | 2         | 0       | 1.5   | 2.0   | 1.5   | –      | 14887.249 | 0.003              |
| 2        | 0      | 2.5  | 2.0  | 1.5  | 2         | 0       | 1.5   | 1.0   | 1.5   | +      | 14912.673 | –0.001             |
| 2        | 0      | 2.5  | 3.0  | 1.5  | 2         | 0       | 1.5   | 2.0   | 1.5   | +      | 14902.272 | –0.008             |
| 2        | 0      | 3.5  | 3.0  | 1.5  | 2         | 0       | 2.5   | 2.0   | 1.5   | –      | 20869.325 | 0.016              |
| 2        | 0      | 3.5  | 4.0  | 1.5  | 2         | 0       | 2.5   | 3.0   | 1.5   | –      | 20864.678 | –0.011             |
| 2        | 0      | 3.5  | 3.0  | 1.5  | 2         | 0       | 2.5   | 2.0   | 1.5   | +      | 20840.153 | –0.001             |
| 2        | 0      | 3.5  | 4.0  | 1.5  | 2         | 0       | 2.5   | 3.0   | 1.5   | +      | 20835.552 | –0.007             |

<sup>a</sup>In MHz.

<sup>b</sup>Observed minus calculated frequencies.

**Table S2. FTMW data of Ar-OD<sup>a</sup>**

| $v'_s$ | $v'$ | $J'$ | $F'$ | $P'$ | $v''_s$ | $v''$ | $J''$ | $F''$ | $P''$ | parity | Obs.      | O – C <sup>b</sup> |
|--------|------|------|------|------|---------|-------|-------|-------|-------|--------|-----------|--------------------|
| 0      | 0    | 2.5  | 1.5  | 1.5  | 0       | 0     | 1.5   | 0.5   | 1.5   | –      | 15014.943 | 0.007              |
| 0      | 0    | 2.5  | 2.5  | 1.5  | 0       | 0     | 1.5   | 1.5   | 1.5   | –      | 15013.551 | 0.003              |
| 0      | 0    | 2.5  | 3.5  | 1.5  | 0       | 0     | 1.5   | 2.5   | 1.5   | –      | 15010.020 | 0.008              |
| 0      | 0    | 2.5  | 1.5  | 1.5  | 0       | 0     | 1.5   | 1.5   | 1.5   | –      | 15009.489 | 0.005              |
| 0      | 0    | 2.5  | 2.5  | 1.5  | 0       | 0     | 1.5   | 2.5   | 1.5   | –      | 15004.347 | 0.003              |
| 0      | 0    | 2.5  | 1.5  | 1.5  | 0       | 0     | 1.5   | 0.5   | 1.5   | +      | 15021.848 | 0.005              |
| 0      | 0    | 2.5  | 2.5  | 1.5  | 0       | 0     | 1.5   | 1.5   | 1.5   | +      | 15020.454 | 0.000              |
| 0      | 0    | 2.5  | 3.5  | 1.5  | 0       | 0     | 1.5   | 2.5   | 1.5   | +      | 15016.915 | –0.004             |
| 0      | 0    | 2.5  | 1.5  | 1.5  | 0       | 0     | 1.5   | 1.5   | 1.5   | +      | 15016.398 | 0.004              |
| 0      | 0    | 2.5  | 2.5  | 1.5  | 0       | 0     | 1.5   | 2.5   | 1.5   | +      | 15011.252 | –0.001             |
| 0      | 0    | 3.5  | 2.5  | 1.5  | 0       | 0     | 2.5   | 1.5   | 1.5   | –      | 21023.351 | 0.002              |
| 0      | 0    | 3.5  | 3.5  | 1.5  | 0       | 0     | 2.5   | 2.5   | 1.5   | –      | 21022.607 | 0.013              |
| 0      | 0    | 3.5  | 4.5  | 1.5  | 0       | 0     | 2.5   | 3.5   | 1.5   | –      | 21021.123 | –0.006             |
| 0      | 0    | 3.5  | 2.5  | 1.5  | 0       | 0     | 2.5   | 1.5   | 1.5   | +      | 21009.828 | 0.012              |
| 0      | 0    | 3.5  | 3.5  | 1.5  | 0       | 0     | 2.5   | 2.5   | 1.5   | +      | 21009.076 | 0.013              |
| 0      | 0    | 3.5  | 4.5  | 1.5  | 0       | 0     | 2.5   | 3.5   | 1.5   | +      | 21007.612 | 0.012              |
| 0      | 0    | 4.5  | 3.5  | 1.5  | 0       | 0     | 3.5   | 2.5   | 1.5   | –      | 26999.319 | –0.009             |
| 0      | 0    | 4.5  | 4.5  | 1.5  | 0       | 0     | 3.5   | 3.5   | 1.5   | –      | 26998.875 | –0.001             |
| 0      | 0    | 4.5  | 5.5  | 1.5  | 0       | 0     | 3.5   | 4.5   | 1.5   | –      | 26998.090 | –0.011             |
| 0      | 0    | 4.5  | 3.5  | 1.5  | 0       | 0     | 3.5   | 2.5   | 1.5   | +      | 27021.262 | –0.004             |
| 0      | 0    | 4.5  | 4.5  | 1.5  | 0       | 0     | 3.5   | 3.5   | 1.5   | +      | 27020.828 | 0.017              |
| 0      | 0    | 4.5  | 5.5  | 1.5  | 0       | 0     | 3.5   | 4.5   | 1.5   | +      | 27020.027 | –0.008             |
| 0      | 0    | 5.5  | 4.5  | 1.5  | 0       | 0     | 4.5   | 3.5   | 1.5   | –      | 33012.691 | –0.008             |
| 0      | 0    | 5.5  | 5.5  | 1.5  | 0       | 0     | 4.5   | 4.5   | 1.5   | –      | 33012.395 | –0.012             |
| 0      | 0    | 5.5  | 6.5  | 1.5  | 0       | 0     | 4.5   | 5.5   | 1.5   | –      | 33011.930 | –0.011             |
| 0      | 0    | 5.5  | 4.5  | 1.5  | 0       | 0     | 4.5   | 3.5   | 1.5   | +      | 32980.913 | 0.003              |
| 0      | 0    | 5.5  | 5.5  | 1.5  | 0       | 0     | 4.5   | 4.5   | 1.5   | +      | 32980.624 | 0.003              |
| 0      | 0    | 5.5  | 6.5  | 1.5  | 0       | 0     | 4.5   | 5.5   | 1.5   | +      | 32980.144 | –0.014             |
| 0      | 0    | 6.5  | 5.5  | 1.5  | 0       | 0     | 5.5   | 4.5   | 1.5   | –      | 38952.701 | –0.002             |
| 0      | 0    | 6.5  | 6.5  | 1.5  | 0       | 0     | 5.5   | 5.5   | 1.5   | –      | 38952.510 | –0.002             |
| 0      | 0    | 6.5  | 7.5  | 1.5  | 0       | 0     | 5.5   | 6.5   | 1.5   | –      | 38952.213 | –0.003             |
| 0      | 0    | 6.5  | 5.5  | 1.5  | 0       | 0     | 5.5   | 4.5   | 1.5   | +      | 38995.422 | 0.014              |
| 0      | 0    | 6.5  | 6.5  | 1.5  | 0       | 0     | 5.5   | 5.5   | 1.5   | +      | 38995.217 | 0.004              |
| 0      | 0    | 6.5  | 7.5  | 1.5  | 0       | 0     | 5.5   | 6.5   | 1.5   | +      | 38994.909 | –0.005             |

<sup>a</sup>In MHz.

<sup>b</sup>Observed minus calculated frequencies.

**Table S3. IR-UV double resonance data of Ar-OH<sup>a</sup>**

| $\nu'_s$ | $\nu'$ | $J'$ | $P'$ | $\nu''_s$ | $\nu''$ | $J''$ | $P''$ | parity           | Obs.    | O – C <sup>b</sup> |
|----------|--------|------|------|-----------|---------|-------|-------|------------------|---------|--------------------|
| 1        | 0      | 6.5  | 1.5  | 0         | 0       | 7.5   | 1.5   | +/- <sup>c</sup> | 3566.22 | -0.02              |
| 1        | 0      | 5.5  | 1.5  | 0         | 0       | 6.5   | 1.5   | +/- <sup>c</sup> | 3566.45 | -0.01              |
| 1        | 0      | 4.5  | 1.5  | 0         | 0       | 5.5   | 1.5   | +/- <sup>c</sup> | 3566.67 | -0.01              |
| 1        | 0      | 3.5  | 1.5  | 0         | 0       | 4.5   | 1.5   | +/- <sup>c</sup> | 3566.90 | 0.00               |
| 1        | 0      | 2.5  | 1.5  | 0         | 0       | 3.5   | 1.5   | +/- <sup>c</sup> | 3567.12 | 0.01               |
| 1        | 0      | 1.5  | 1.5  | 0         | 0       | 2.5   | 1.5   | +/- <sup>c</sup> | 3567.34 | 0.02               |
| 1        | 0      | 1.5  | 1.5  | 0         | 0       | 1.5   | 1.5   | +/- <sup>c</sup> | 3567.83 | 0.00               |
| 1        | 0      | 2.5  | 1.5  | 0         | 0       | 1.5   | 1.5   | +/- <sup>c</sup> | 3568.35 | 0.01               |
| 1        | 0      | 3.5  | 1.5  | 0         | 0       | 2.5   | 1.5   | +/- <sup>c</sup> | 3568.54 | 0.01               |
| 1        | 0      | 4.5  | 1.5  | 0         | 0       | 3.5   | 1.5   | +/- <sup>c</sup> | 3568.73 | 0.00               |
| 1        | 0      | 5.5  | 1.5  | 0         | 0       | 4.5   | 1.5   | +/- <sup>c</sup> | 3568.92 | 0.01               |
| 1        | 0      | 6.5  | 1.5  | 0         | 0       | 5.5   | 1.5   | +/- <sup>c</sup> | 3569.12 | 0.02               |
| 1        | 0      | 7.5  | 1.5  | 0         | 0       | 6.5   | 1.5   | +/- <sup>c</sup> | 3569.29 | 0.01               |
| 1        | 0      | 2.5  | 0.5  | 0         | 0       | 3.5   | 1.5   | +                | 3576.87 | -0.02              |
| 1        | 0      | 2.5  | 0.5  | 0         | 0       | 3.5   | 1.5   | -                | 3575.81 | -0.03              |
| 1        | 0      | 1.5  | 0.5  | 0         | 0       | 2.5   | 1.5   | +                | 3576.16 | -0.01              |
| 1        | 0      | 1.5  | 0.5  | 0         | 0       | 2.5   | 1.5   | -                | 3576.87 | 0.00               |
| 1        | 0      | 0.5  | 0.5  | 0         | 0       | 1.5   | 1.5   | +                | 3576.87 | 0.00               |
| 1        | 0      | 0.5  | 0.5  | 0         | 0       | 1.5   | 1.5   | -                | 3576.51 | -0.02              |
| 1        | 0      | 1.5  | 0.5  | 0         | 0       | 1.5   | 1.5   | +                | 3576.68 | 0.00               |
| 1        | 0      | 1.5  | 0.5  | 0         | 0       | 1.5   | 1.5   | -                | 3577.37 | -0.01              |
| 1        | 0      | 2.5  | 0.5  | 0         | 0       | 2.5   | 1.5   | +                | 3577.59 | -0.01              |
| 1        | 0      | 2.5  | 0.5  | 0         | 0       | 2.5   | 1.5   | -                | 3576.54 | -0.02              |
| 1        | 0      | 3.5  | 0.5  | 0         | 0       | 3.5   | 1.5   | +                | 3576.51 | 0.06 <sup>d</sup>  |
| 1        | 0      | 3.5  | 0.5  | 0         | 0       | 3.5   | 1.5   | -                | 3577.84 | 0.00 <sup>d</sup>  |
| 1        | 0      | 2.5  | 0.5  | 0         | 0       | 1.5   | 1.5   | +                | 3578.09 | -0.03 <sup>d</sup> |
| 1        | 0      | 2.5  | 0.5  | 0         | 0       | 1.5   | 1.5   | -                | 3577.11 | 0.04 <sup>d</sup>  |
| 1        | 0      | 3.5  | 0.5  | 0         | 0       | 2.5   | 1.5   | +                | 3577.17 | 0.00 <sup>d</sup>  |
| 1        | 0      | 3.5  | 0.5  | 0         | 0       | 2.5   | 1.5   | -                | 3578.54 | -0.02 <sup>d</sup> |
| 1        | 0      | 4.5  | 0.5  | 0         | 0       | 3.5   | 1.5   | +                | 3579.01 | 0.00 <sup>d</sup>  |
| 2        | 0      | 1.5  | 1.5  | 0         | 0       | 1.5   | 1.5   | +/- <sup>c</sup> | 6970.4  | -0.24              |

<sup>a</sup> In cm<sup>-1</sup>.

<sup>b</sup> Observed minus calculated frequencies.

<sup>c</sup> Not resolved.

<sup>d</sup> Not included in the analysis.

**Table S4. SEP data of Ar-OH <sup>a</sup>**

| $\nu'_s$ | $\nu'$ | $J'$ | $P'$ | $\nu''_s$ | $\nu''$ | $J''$ | $P''$ | parity         | Obs. | O - C <sup>b</sup> |
|----------|--------|------|------|-----------|---------|-------|-------|----------------|------|--------------------|
| 0        | 0      | 1.5  | 0.5  | 0         | 0       | 1.5   | 1.5   | - <sup>c</sup> | 9.19 | -0.23              |
| 0        | 0      | 1.5  | -0.5 | 0         | 0       | 1.5   | 1.5   | - <sup>c</sup> | 19.2 | -0.5               |
| 0        | 0      | 1.5  | -1.5 | 0         | 0       | 1.5   | 1.5   | - <sup>c</sup> | 21.3 | 0.0                |
| 0        | 1      | 1.5  | 1.5  | 0         | 0       | 1.5   | 1.5   | - <sup>c</sup> | 34.9 | 0.3                |

<sup>a</sup> In  $\text{cm}^{-1}$ .

<sup>b</sup> Observed minus calculated frequencies.

<sup>c</sup> Parity components were not resolved.

**Table S5 3D average potential parameters of Ar–OH <sup>a</sup>**

|                                  | $q^0$                     |                       | $q^1$                                          |                           | $q^2$                 |                                                |                          |                       |
|----------------------------------|---------------------------|-----------------------|------------------------------------------------|---------------------------|-----------------------|------------------------------------------------|--------------------------|-----------------------|
|                                  | Fitted                    | <i>ab initio</i>      | Fitted                                         | <i>ab initio</i>          | Fitted                | <i>ab initio</i>                               |                          |                       |
| $b_{\Pi e}^0 / \text{Å}^{-1}$    | → <sup>b</sup>            | −3.4435               | $b_{\Pi i}^0 / \text{Å}^{-2}$                  | →                         | 0.8021                | $b_{\Pi 2}^0 / \text{Å}^{-3}$                  | →                        | 0.4879                |
| $b_{\Pi e}^1 / \text{Å}^{-1}$    | →                         | 0.6201                | $b_{\Pi i}^1 / \text{Å}^{-2}$                  | →                         | 0.1137                | $b_{\Pi 2}^1 / \text{Å}^{-3}$                  | →                        | −0.00305              |
| $b_{\Pi e}^2 / \text{Å}^{-1}$    | →                         | 0.00246               | $b_{\Pi i}^2 / \text{Å}^{-2}$                  | →                         | −0.0145               | $b_{\Pi 2}^2 / \text{Å}^{-3}$                  | →                        | −0.1996               |
| $g_{0,\Pi e}^0 / \text{cm}^{-1}$ | $−7.905(34) \times 10^6$  | $−7.5551 \times 10^6$ | $g_{0,\Pi i}^0 / \text{cm}^{-1} \text{Å}^{-1}$ | $6.544(28) \times 10^7$   | $6.0510 \times 10^7$  | $g_{0,\Pi 2}^0 / \text{cm}^{-1} \text{Å}^{-2}$ | $−2.423(16) \times 10^8$ | $−2.1312 \times 10^8$ |
| $g_{0,\Pi e}^1 / \text{cm}^{-1}$ | $5.9417(77) \times 10^7$  | $5.9089 \times 10^7$  | $g_{0,\Pi i}^1 / \text{cm}^{-1} \text{Å}^{-1}$ | $−1.4995(28) \times 10^8$ | $−1.4495 \times 10^8$ | $g_{0,\Pi 2}^1 / \text{cm}^{-1} \text{Å}^{-2}$ | $3.067(17) \times 10^8$  | $2.7786 \times 10^8$  |
| $g_{0,\Pi e}^2 / \text{cm}^{-1}$ | $−3.0649(45) \times 10^7$ | $−3.0654 \times 10^7$ | $g_{0,\Pi i}^2 / \text{cm}^{-1} \text{Å}^{-1}$ | →                         | $5.7487 \times 10^7$  | $g_{0,\Pi 2}^2 / \text{cm}^{-1} \text{Å}^{-2}$ | →                        | $−1.7152 \times 10^8$ |
| $g_{0,\Pi e}^3 / \text{cm}^{-1}$ | →                         | $1.8032 \times 10^7$  | $g_{0,\Pi i}^3 / \text{cm}^{-1} \text{Å}^{-1}$ | →                         | $−2.9275 \times 10^6$ |                                                |                          |                       |
| $g_{0,\Pi e}^4 / \text{cm}^{-1}$ | →                         | $1.5523 \times 10^6$  |                                                |                           |                       |                                                |                          |                       |

**Table S5 Continued<sup>a</sup>**

|                                                | $q^0$  |                       | $q^1$                                          |                  | $q^2$                 |                                                |   |                       |
|------------------------------------------------|--------|-----------------------|------------------------------------------------|------------------|-----------------------|------------------------------------------------|---|-----------------------|
|                                                | Fitted | <i>ab initio</i>      | Fitted                                         | <i>ab initio</i> | Fitted                | <i>ab initio</i>                               |   |                       |
| $g_{1,\Pi e}^0 / \text{cm}^{-1} \text{Å}^{-1}$ | →      | $2.3539 \times 10^7$  | $g_{1,\Pi 1}^0 / \text{cm}^{-1} \text{Å}^{-2}$ | →                | $-5.5447 \times 10^7$ | $g_{1,\Pi 2}^0 / \text{cm}^{-1} \text{Å}^{-3}$ | → | $1.0862 \times 10^8$  |
| $g_{1,\Pi e}^1 / \text{cm}^{-1} \text{Å}^{-1}$ | →      | $-5.5906 \times 10^7$ | $g_{1,\Pi 1}^1 / \text{cm}^{-1} \text{Å}^{-2}$ | →                | $1.0444 \times 10^8$  | $g_{1,\Pi 2}^1 / \text{cm}^{-1} \text{Å}^{-3}$ | → | $-1.4500 \times 10^8$ |
| $g_{1,\Pi e}^2 / \text{cm}^{-1} \text{Å}^{-1}$ | →      | $3.0720 \times 10^7$  | $g_{1,\Pi 1}^2 / \text{cm}^{-1} \text{Å}^{-2}$ | →                | $-3.6302 \times 10^7$ | $g_{1,\Pi 2}^2 / \text{cm}^{-1} \text{Å}^{-3}$ | → | $7.0575 \times 10^7$  |
| $g_{1,\Pi e}^3 / \text{cm}^{-1} \text{Å}^{-1}$ | →      | $-1.3643 \times 10^7$ | $g_{1,\Pi 1}^3 / \text{cm}^{-1} \text{Å}^{-2}$ | →                | $4.6281 \times 10^6$  |                                                |   |                       |
| $g_{2,\Pi e}^0 / \text{cm}^{-1} \text{Å}^{-2}$ | →      | $-6.6451 \times 10^6$ | $g_{2,\Pi 1}^0 / \text{cm}^{-1} \text{Å}^{-3}$ | →                | $6.6665 \times 10^6$  |                                                |   |                       |
| $g_{2,\Pi e}^1 / \text{cm}^{-1} \text{Å}^{-2}$ | →      | $1.2638 \times 10^7$  | $g_{2,\Pi 1}^1 / \text{cm}^{-1} \text{Å}^{-3}$ | →                | $-1.2047 \times 10^7$ |                                                |   |                       |
| $g_{2,\Pi e}^2 / \text{cm}^{-1} \text{Å}^{-2}$ | →      | $-6.6026 \times 10^6$ |                                                |                  |                       |                                                |   |                       |
| $g_{2,\Pi e}^3 / \text{cm}^{-1} \text{Å}^{-2}$ | →      | $1.2047 \times 10^7$  |                                                |                  |                       |                                                |   |                       |



**Table S5 Continued<sup>a</sup>**

|                                            | q <sup>0</sup>           |                                  | q <sup>1</sup>                             |                          | q <sup>2</sup>       |                                              |                     |
|--------------------------------------------|--------------------------|----------------------------------|--------------------------------------------|--------------------------|----------------------|----------------------------------------------|---------------------|
|                                            | Fitted                   | <i>ab initio</i>                 | Fitted                                     | <i>ab initio</i>         | Fitted               | <i>ab initio</i>                             |                     |
| $C_{6,\pi e}^0/\text{cm}^{-1}\text{\AA}^6$ | $-2.2715(78)\times 10^5$ | $-2.2482\times 10^5$             | $C_{6,\pi 1}^0/\text{cm}^{-1}\text{\AA}^5$ | $-3.3927(88)\times 10^5$ | $-2.7261\times 10^5$ | $C_{6,\pi 2}^0/\text{cm}^{-1}\text{\AA}^4$ → | $2.7171\times 10^5$ |
| $C_{6,\pi e}^1/\text{cm}^{-1}\text{\AA}^6$ | $-5.631(99)\times 10^4$  | $-5.4869\times 10^4$             | $C_{6,\pi 1}^1/\text{cm}^{-1}\text{\AA}^5$ | →                        | $-2.4872\times 10^5$ | $C_{6,\pi 2}^1/\text{cm}^{-1}\text{\AA}^4$ → | $1.5836\times 10^5$ |
| $C_{6,\pi e}^2/\text{cm}^{-1}\text{\AA}^6$ | $-8.004(71)\times 10^4$  | $-7.7254\times 10^4$             | $C_{6,\pi 1}^2/\text{cm}^{-1}\text{\AA}^5$ | →                        | $-1.0151\times 10^5$ |                                              |                     |
| $C_{6,\pi e}^3/\text{cm}^{-1}\text{\AA}^6$ | →                        | $-2.2878\times 10^4$             | $C_{6,\pi 1}^3/\text{cm}^{-1}\text{\AA}^5$ | →                        | $-3.5245\times 10^4$ |                                              |                     |
| $C_{6,\pi e}^4/\text{cm}^{-1}\text{\AA}^6$ | →                        | $-6.9243\times 10^3$             |                                            |                          |                      |                                              |                     |
| $C_{8,\pi e}^0/\text{cm}^{-1}\text{\AA}^8$ | →                        | $-1.8844\times 10^6$             | $C_{8,\pi 1}^0/\text{cm}^{-1}\text{\AA}^7$ | →                        | $2.8819\times 10^6$  |                                              |                     |
| $C_{8,\pi e}^1/\text{cm}^{-1}\text{\AA}^8$ | →                        | $3.4307\times 10^5$              | $C_{8,\pi 1}^1/\text{cm}^{-1}\text{\AA}^7$ | →                        | $3.4960\times 10^6$  |                                              |                     |
| $C_{8,\pi e}^2/\text{cm}^{-1}\text{\AA}^8$ | →                        | $7.1442\times 10^5$              |                                            |                          |                      |                                              |                     |
|                                            |                          | $\sigma_{\text{fit}}/\text{kHz}$ |                                            | 11.3                     |                      |                                              |                     |

<sup>a</sup>Values in parentheses denote one standard deviation of the fit and apply to the last digits.

<sup>b</sup>Fixed to the values from the *ab initio* calculation.

**Table S6 3D difference potential parameters of Ar–OH<sup>a</sup>**

|                                             | q <sup>0</sup>             |                       | q <sup>1</sup>                              |                           | q <sup>2</sup>        |                                             |                          |                       |
|---------------------------------------------|----------------------------|-----------------------|---------------------------------------------|---------------------------|-----------------------|---------------------------------------------|--------------------------|-----------------------|
|                                             | Fitted                     | <i>ab initio</i>      | Fitted                                      | <i>ab initio</i>          | Fitted                | <i>ab initio</i>                            |                          |                       |
| $b_{2e}^0 / \text{Å}^{-1}$                  | → <sup>b</sup>             | −2.7343               | $b_{21}^0 / \text{Å}^{-2}$                  | →                         | 0.1403                | $b_{22}^0 / \text{Å}^{-3}$                  | →                        | 0.2092                |
| $b_{2e}^1 / \text{Å}^{-1}$                  | →                          | 0.2329                | $b_{21}^1 / \text{Å}^{-2}$                  | →                         | −0.1085               |                                             |                          |                       |
| $b_{2e}^2 / \text{Å}^{-1}$                  | →                          | 0.0453                | $b_{21}^2 / \text{Å}^{-2}$                  | →                         |                       |                                             |                          |                       |
| $b_{2e}^3 / \text{Å}^{-1}$                  | →                          | 0.00502               | $b_{21}^3 / \text{Å}^{-2}$                  | →                         |                       |                                             |                          |                       |
| $g_{0,2e}^0 / \text{cm}^{-1}$               | $4.2414(30) \times 10^6$   | $4.2266 \times 10^6$  | $g_{0,21}^0 / \text{cm}^{-1} \text{Å}^{-1}$ | $-0.457(161) \times 10^6$ | $-1.5094 \times 10^6$ | $g_{0,22}^0 / \text{cm}^{-1} \text{Å}^{-2}$ | $-10.07(92) \times 10^6$ | $-1.9210 \times 10^6$ |
| $g_{0,2e}^1 / \text{cm}^{-1}$               | $-10.557(177) \times 10^5$ | $-9.885 \times 10^5$  | $g_{0,21}^1 / \text{cm}^{-1} \text{Å}^{-1}$ | →                         | $1.0074 \times 10^5$  |                                             |                          |                       |
| $g_{0,2e}^2 / \text{cm}^{-1}$               | $12.2(26) \times 10^4$     | $5.38 \times 10^4$    | $g_{0,21}^2 / \text{cm}^{-1} \text{Å}^{-1}$ | →                         |                       |                                             |                          |                       |
| $g_{1,2e}^0 / \text{cm}^{-1} \text{Å}^{-1}$ | →                          | $-9.4505 \times 10^5$ | $g_{1,21}^0 / \text{cm}^{-1} \text{Å}^{-2}$ | →                         | $3.9408 \times 10^5$  |                                             |                          |                       |
| $g_{1,2e}^1 / \text{cm}^{-1} \text{Å}^{-1}$ | →                          | $2.0459 \times 10^5$  | $g_{1,21}^1 / \text{cm}^{-1} \text{Å}^{-2}$ | →                         | $3.1993 \times 10^4$  |                                             |                          |                       |
| $C_{6,2e}^0 / \text{cm}^{-1} \text{Å}^6$    | →                          | $-2.2649 \times 10^4$ | $C_{6,21}^0 / \text{cm}^{-1} \text{Å}^5$    | →                         | $-2.6511 \times 10^4$ | $C_{6,22}^6 / \text{cm}^{-1} \text{Å}^4$    | →                        | $1.1638 \times 10^5$  |
| $C_{6,2e}^1 / \text{cm}^{-1} \text{Å}^6$    | →                          | $1.1032 \times 10^4$  | $C_{6,21}^0 / \text{cm}^{-1} \text{Å}^5$    | →                         | $-7.3600 \times 10^3$ |                                             |                          |                       |
| $C_{6,2e}^2 / \text{cm}^{-1} \text{Å}^6$    | →                          | $1.9673 \times 10^3$  |                                             |                           |                       |                                             |                          |                       |

<sup>a</sup>Values in parentheses denote one standard deviation of the fit and apply to the last digits.

<sup>b</sup>Fixed to the values from the *ab initio* calculation
